# Supplementary material for: p-Nitro-tetradecyloxy-calix[4]arene as a highly selective stationary phase for gas chromatographic separations
Source: Royal Society of Chemistry journal article supplement (doi:10.1039/c9nj03813b), 2019-01-01
Supplement: c9nj03813b1.pdf [file c9nj03813b1.pdf]

## Supplementary materials

### **The *p*-nitro-tetradecyloxy-calix[4]arene as a highly selective stationary phase for gas chromatographic separations**

Tao Sun<sup>a\*</sup>, Xiaomin Shuai<sup>b</sup>, Bin Li<sup>c</sup>, Kaixin Ren<sup>a</sup>, Xingxing Jiang<sup>a</sup>, Haipeng Chen<sup>a</sup>,  
Shaoqiang Hu<sup>a</sup>, Zhiqiang Cai<sup>b\*</sup>

<sup>a</sup> *College of Chemistry and Chemical Engineering, Henan Key Laboratory of Function-Oriented Porous Materials, Luoyang Normal University, Luoyang 471934, P. R. China*

<sup>b</sup> *Liaoning Province Engineering Research Center for Fine Chemical Engineering of Aromatics Downstream, School of Petrochemical Engineering, Shenyang University of Technology, Liaoyang, 111003, Liaoning, P. R. China*

<sup>c</sup> *Hebei Key Laboratory of Heterocyclic Compounds, Handan University, Handan 056005, P. R. China*

\* Corresponding author.

E-mail addresses: *suntao2226@163.com* (T. Sun); *kahongzqc@163.com* (Z. Cai)

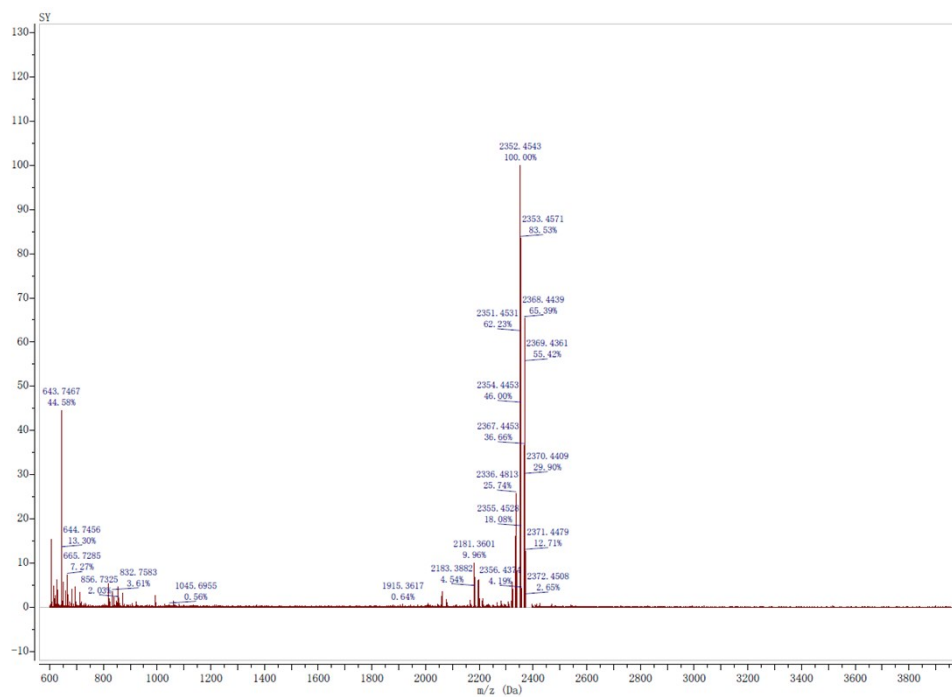

**Fig. S1.** Section of MALDI-TOF mass spectrum of C4A-NO<sub>2</sub>.
